# Supplementary material for: A novel laminated polycaprolactone/paper/silver electrode for lead(ii) detection
Source: Royal Society of Chemistry journal article supplement (doi:10.1039/c6ay03414d), 2017-01-01
Supplement: c6ay03414d1.pdf [file c6ay03414d1.pdf]

1 Electronic Supplementary Material (ESI) for Analytical Methods.

2 This journal is © The Royal Society of Chemistry 2016

3

4 **Electronic Supplementary Information**

5

6 **A novel laminated polycaprolactone/paper/silver electrode for lead (II) detection**

7 Peng Yu<sup>ab</sup>, Christopher A. Heist<sup>a</sup>, Vincent T. Remcho<sup>\*a</sup>

8 *<sup>a</sup>Department of Chemistry, Oregon State University, Corvallis, Oregon, 97331, United States of*  
9 *America*

10 *<sup>b</sup>State Key Laboratory of Chemo/Biosensing and Chemometrics, College of Chemistry and*  
11 *Chemical Engineering, Hunan University, Changsha, Hunan, 410082, P.R. China*

12 \*Corresponding author: Tel.: +1 541-737-8181; Fax: +1 541-737-2062; Email:  
13 [vince.remcho@oregonstate.edu](mailto:vince.remcho@oregonstate.edu)

14

15 **List of Contents:**

16 **1. Materials and instruments**

17 **2. Preparation of the PCL-coated paper**

18 **3. Electrochemical cell**

19 **4. Fig. S1**

20 **5. Fig. S2**

21 **6. Table S1**

## 23 **1 Materials and instruments**

24 Silver conductive ink (AG-755) was purchased from Conductive Compounds (Hudson, NH,  
25 USA). Polycaprolactone (PCL) pellets (Capa™ 6800) were supplied by Perstorp (Warrington,  
26 Cheshire, UK). Lead (II) nitrate,  $\text{Pb}(\text{NO}_3)_2$ , was bought from Sigma Aldrich (St. Louis, MO,  
27 USA). All other chemicals used in this work were of analytical grade. Whatman chromatography  
28 paper (Grade 1 CHR) was bought from GE Healthcare Life Sciences (Little Chalfont,  
29 Buckinghamshire, UK). Disposable antistatic microspatulas (length 14 cm, color opaque) were  
30 bought from VWR International, LLC (Radnor, PA, USA). The buffer solution used for preparing  
31 standard solutions of Pb (II) is acetate buffer (0.2 M, pH 4.4) according to the similar references.<sup>1,2</sup>  
32 The pH value of the acetate buffer was selected to be 4.4 according to similar studies.<sup>1,2</sup> For the  
33 specificity study of the developed electrode, several commonly occurring inorganic cations ( $\text{Fe}^{3+}$ ,  
34  $\text{K}^+$ ,  $\text{Na}^+$ ,  $\text{Ca}^{2+}$ ,  $\text{Mg}^{2+}$ ) have been checked. And the salt for preparing such solutions were all in  
35 chloride form ( $\text{FeCl}_3 \cdot 6\text{H}_2\text{O}$ ,  $\text{KCl}$ ,  $\text{NaCl}$ ,  $\text{CaCl}_2$ ,  $\text{MgCl}_2 \cdot 6\text{H}_2\text{O}$ ). Aqueous solutions used throughout  
36 were prepared with ultrapure water ( $>18.2 \text{ M}\Omega \text{ cm}$  resistivity) obtained from a Milli-Q water  
37 purification system.

38 All patterning work was accomplished using a 50 W  $\text{CO}_2$  laser cutter (VLS 3.50, Universal  
39 Laser Systems, Scottsdale, AZ, USA). The electrochemical measurements were carried out on a  
40 CHI 123B Electrochemical Workstation (CH Instruments; Austin, TX, USA). For square-wave  
41 anodic stripping voltammetry (SWASV) measurements, a conventional three-electrode system  
42 was used. The paper/silver electrode was made in-house and used as the working electrode.  
43 Additional printed electrodes (model TE100) were acquired from CH instruments (Austin, TX,  
44 USA); these were used as a counter-electrode (carbon) and a reference-electrode (Ag).

## 45 **2 Preparation of the PCL-coated paper**

46 The 15% (w/v) PCL solution was prepared by completely dissolving bulk PCL pellets in toluene.<sup>3</sup>  
47 Whatman chromatography paper was soaked in the PCL solution, then dried at ambient  
48 temperature in a fume hood. The thin PCL film thus produced was used as hydrophobic fluidic  
49 barrier, an electrical insulator, and as an adhesion layer. Bonding occurs when the PCL layer  
50 reaches its melting temperature of  $60 \text{ }^\circ\text{C}$ , allowing for complex 3-D devices to be made easily and  
51 quickly.

## 52 **3 Electrochemical Cell**

53 A glass beaker (10 mL capacity) was used as the electrochemical cell, including a fabricated  
54 laminated paper/silver electrode (LPSE) as working electrode, a printed carbon counter electrode,  
55 a printed silver electrode as pseudo reference electrode and a mixing magneton.

56 **4 Figure S1**

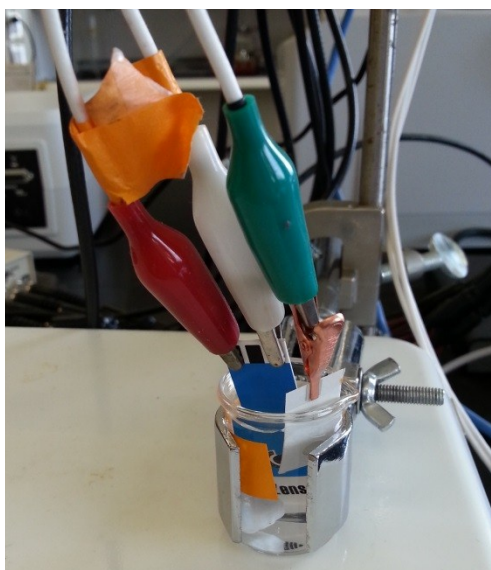

57

58

**Fig. S1.** The image of the electrochemical cell

59 **5. Figure S2**

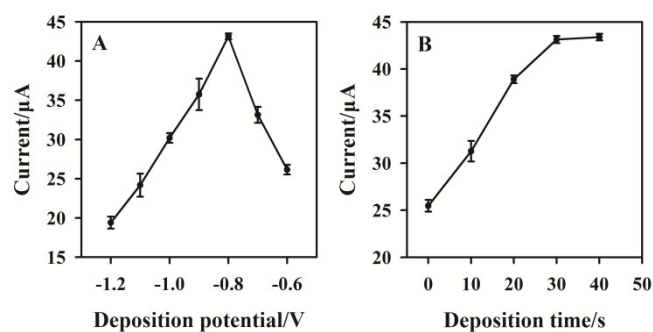

60

61 **Fig. S2.** Effect of deposition potential (A) and deposition time (B) on the peak current for lead ions. The  
 62 concentration of lead ions in the solution for optimization of detection conditions is 10  $\mu$ M. Error bars  
 63 represent the standard deviations of three replicate experiments.

64 **6 Table S1**

65

**Table S1** Recovery assays of  $Pb^{2+}$  in drinking water samples

| sample | Added [nM] | Found [nM] | RSD [%] | Recovery [%] |
|--------|------------|------------|---------|--------------|
| 1      | 0          | ND         |         |              |
| 2      | 100        | 98         | 5.8     | 98           |
| 3      | 200        | 196        | 4.0     | 98           |

---

|   |     |     |     |     |
|---|-----|-----|-----|-----|
| 4 | 300 | 284 | 1.3 | 95  |
| 5 | 400 | 413 | 3.3 | 103 |
| 6 | 500 | 516 | 1.7 | 103 |

---

66 <sup>a</sup>ND: not detectable.

67 **References**

68 1 R. María-Hormigos, M. J. Gismera, J. R. Procopio and M. T. Sevilla, *J. Electroanal. Chem.*,  
69 2016, **767**, 114–122.

70 2 S. Chaiyo, E. Mehmeti, K. Zagar, W. Siangproh, O. Chailapakul and K. Kalcher, *Anal. Chim.*  
71 *Acta*, 2016, **918**, 26–34.

72 3 M. T. Koesdjojo, J. Nammoonoy, Y. Wu, R. T. Frederick and V. T. Remcho, *J. Micromech.*  
73 *Microeng.*, 2012, **22**, 115030.
